# Supplementary material for: A cross-dipole stacking molecule of an anthracene derivative: integrating optical and electrical properties
Source: Royal Society of Chemistry journal article supplement (doi:10.1039/c4tc02964j), 2015-01-01
Supplement: c4tc02964j1.pdf [file c4tc02964j1.pdf]

*Electronic Supplementary Information (ESI)*

## **Cross-dipole stacking molecule of an anthracene derivative: integrating optical and electrical properties**

Jie Liu,<sup>a,b</sup> Lingqiang Meng,<sup>b,c</sup> Weigang Zhu,<sup>a</sup> Congcong Zhang,<sup>d</sup> Hantang Zhang,<sup>a,b</sup> Yifan Yao,<sup>a,b</sup>  
Zongrui Wang,<sup>a,b</sup> Ping He,<sup>a</sup> Xiaotao Zhang,<sup>a</sup> Ying Wang,<sup>c</sup> Yonggang Zhen,<sup>a</sup> Huanli Dong,<sup>a</sup>  
Yuanping Yi<sup>a</sup> and Wenping Hu<sup>a,d,\*</sup>

<sup>a</sup>*Beijing National Laboratory for Molecular Science, Key Laboratory of Organic Solids,  
Institute of Chemistry, Chinese Academy of Sciences, Beijing 100190, China.*

<sup>b</sup>*University of the Chinese Academy of Sciences, Beijing 100190, China.*

<sup>c</sup>*Key Laboratory of Photochemical Conversion and Optoelectronic Materials, Technical  
Institute of Physics and Chemistry, Chinese Academy of Sciences, Beijing, 100190,  
China.*

<sup>d</sup>*Collaborative Innovation Center of Chemical Science and Engineering (Tianjin) &  
School of Science, Tianjin University, Tianjin 300072, China.*

**\*Correspondence:** [huwp@iccas.ac.cn](mailto:huwp@iccas.ac.cn)

### **Table of Contents**

#### **Experimental Section**

**Figure S1.** <sup>1</sup>H and <sup>13</sup>C NMR spectra of TES-DPA in CDCl<sub>3</sub>

**Table S1.** Crystal data and structure refinement for TES-DPA (CCDC998335)

**Figure S2.** Fluorescence quantum efficiency of TES-DPA solution

**Figure S3.** Time-resolved peak fluorescence of TES-DPA in THF and solid state by time-correlated single-photon counting (TCSPC) measurement.

**Figure S4.** Power efficiency and current efficiency of OLED based on TES-DPA

## ***Experimental section :***

### *Materials and Instrumentations*

All reagents were used as received from commercial resources unless otherwise specified.

$^1\text{H}$  and  $^{13}\text{C}$  NMR spectra were recorded using a Bruker ADVANCE 400 NMR Spectrometer.  $^1\text{H}$  NMR spectra were referenced to  $\text{CDCl}_3$  (7.26 ppm) and  $^{13}\text{C}$  NMR spectra were referenced to  $\text{CDCl}_3$  solvent (77.36 ppm). UV-vis absorption spectra were measured with Hitachi (model U-3010) UV-Vis spectrophotometer in a 1-cm quartz cell. Photoluminescence (PL) spectra were recorded on a Perkin-Elmer LS 55 spectrofluorometer. Absolute quantum yield measurement (LabSphere®, FluoroMax-4, HORIBA JobinYvon, PLQY software package) was used for powder sample. In this experimental setup, it is possible to measure the Photoluminescence Quantum Yields (PLQY) *via* using the integrating sphere in combination with a commercial fluorometer. Emission spectra including the scattering region of excitation light were measured for both blank and test samples, and these spectra were corrected with instrumental factors to calculate the quantum yield. Florescence quantum efficiency of TES-DPA solution was measured with fluorescence in as reference. Time-resolved peak fluorescence of TES-DPA in THF and solid state were determined by F906 (Edinburgh instrument).

High-quality single crystals of TES-DPA were grown from a chlorobenzene at room temperature. X-ray diffraction intensity data were collected at 113 K on a Rigaku Saturn724 CCD diffract meter with graphite monochromated Mo  $\text{K}\alpha$  radiation. And the structure and refinement were carried out using the Crystal Clear (Rigaku Inc., 2008).

OFET characteristics were recorded by a Keithley 4200 SCS and Micromanipulator 6150 probe station in a clean and shielded box. EL spectra were recorded by PR 655 spectrometer and the J-V test was taken by Keithley 2400.

### ***Synthesis***

**2,6-dibromoanthracene-9,10-dione, 2.** A solution of compound 1 (2,6-diaminoanthracene-9,10-dione) 10 g (41.4 mmol) in anhydrous acetonitrile (200 mL) was added  $\text{CuBr}_2$  20.8 g (93.2 mmol), then  $t\text{-BuONO}$  9.6 g (93.2 mmol) was added to the above suspension, the whole system was allowed to warm up  $63^\circ\text{C}$  for 3 h. After cooling

down to room temperature, the reaction was quenched by adding 20% HCl (100 mL). Then water (200 mL) was added and the brown crude product was obtained by filtration washed with water and air dried. Dioxane (800 mL) was used to dissolve the crude product at refluxing and then active charcoal was added, after filtration, the filtrate was allowed to cool down to room temperature give **2** as light yellow crystals 9.85 g (65%). <sup>1</sup>H NMR (400 MHz, CDCl<sub>3</sub>, δ): 8.64 (s, 2H), 8.18 (d, *J* = 8.0 Hz, 2H), 7.98 (d, *J* = 8.1 Hz, 2H). MS (EI) *m/z*: 366 (M<sup>+</sup>).

**2,6-diphenylanthracene-9,10-dione, 3.** Compound **3** was synthesized by Suzuki coupling reaction. To a 250 mL flask, 1.1 g (3mmol) compound **2**, 0.8 g (6.6mmol) phenylboronic acid and Pd(PPh<sub>3</sub>)<sub>4</sub> 190 mg (0.15mmol) was added under argon. Then 24 mL ethanol, 120 mL toluene and 24mL 2M K<sub>2</sub>CO<sub>3</sub> aqueous solution was added. The whole system was heated to 90 °C and kept overnight. The mixture was separated, and the water layer was extracted with CH<sub>2</sub>Cl<sub>2</sub> (50 mL × 3), the combined organic layer was dried over anhydrous Na<sub>2</sub>SO<sub>4</sub>. Solvent was removed under vacuum. Further purification by column chromatography on silica gel using petroleum ether: CH<sub>2</sub>Cl<sub>2</sub> (3 : 1) as eluent afforded the product as a yellow solid (0.92 g, 85% yield). <sup>1</sup>H NMR (400 MHz, CDCl<sub>3</sub>, δ): 8.58 (d, *J* = 1.7 Hz, 1H), 8.42 (d, *J* = 8.1 Hz, 1H), 8.04 (dd, *J* = 8.1, 1.8 Hz, 1H), 7.76 (d, *J* = 7.5 Hz, 2H), 7.53 (t, *J* = 7.4 Hz, 2H), 7.47 (t, *J* = 7.3 Hz, 1H). MS (EI) *m/z*: 360 (M<sup>+</sup>).

**((2,6-diphenylanthracene-9,10-diyl)bis(ethyne-2,1-diyl))bis(trialkylsilane) 4.** To a 250 mL round-bottom flask containing 100 mL anhydrous THF, triethyl(ethynyl)silane 4.03 g (27.88 mmol) was added and the stirring system was placed in an ice-water bath, then 7.8 mL (6.25 mmol 2M) *n*-BuLi was added slowly and this mixture was stirred for 1 h at 0 °C. Then compound **3** 1.8 g (5 mmol) was added quickly, and the mixture was stirred overnight. Stannous chloride dihydrate 2.83 g (12.5 mmol) and 12.5 mL 10% HCl was added to the mixture which was stirred for another 7 h. Then the whole system was extracted with hexanes (60 mL × 3) and the combined organic layer was washed with saturated brine solution, dried over anhydrous Na<sub>2</sub>SO<sub>4</sub> and concentrated. The final TES-DPA was to be obtained after silica chromatography (eluent: petroleum ether) with a yield of 46% (1.4 g). <sup>1</sup>H NMR (400 MHz, CDCl<sub>3</sub>, δ): 9.10 (s, 2H), 8.54 (d, *J* = 7.6 Hz, 2H), 7.73 (t, *J* = 7.7 Hz, 2H), 7.47 (d, *J* = 8.1 Hz, 4H), 7.39 (t, *J* = 7.5 Hz, 4H), 4.52 (t, *J* =

7.3 Hz, 2H), 1.99 (d,  $J = 7.0$  Hz, 18H), 0.89 – 0.84 (m, 12H).  $^{13}\text{C}$  NMR (101 MHz,  $\text{CDCl}_3$ ,  $\delta$ ): 140.91, 139.32, 132.96, 132.20, 129.26, 128.23, 128.05, 127.65, 127.13 (s), 125.25, 118.95, 106.38, 103.08, 8.21, 5.03. MS (EI)  $m/z$ : 606 ( $\text{M}^+$ ). Anal. calcd for  $\text{C}_{42}\text{H}_{46}\text{Si}_2$  (%): C: 83.11, H: 7.64. Found: C: 83.72, H: 7.88.

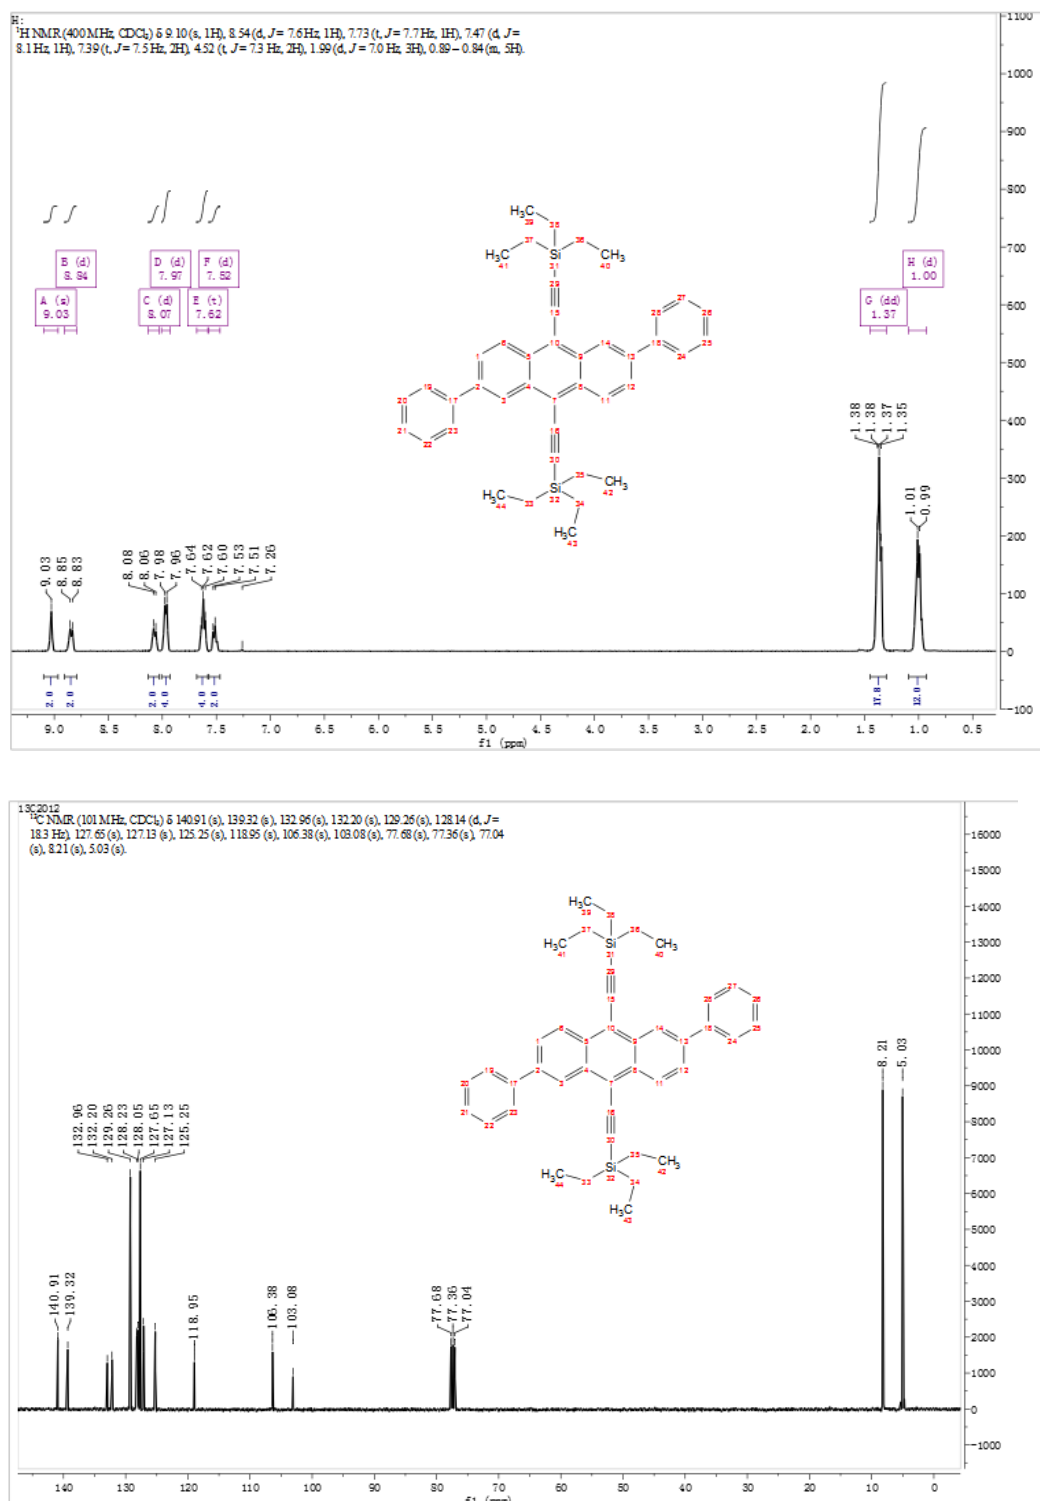

**Figure S1**  $^1\text{H}$ NMR and  $^{13}\text{C}$  NMR of TES-DPA.

**Table S1. Crystal Data and Structure Refinement for *TES-DPA*(CCDC998335)**

|                                   |                                                                                                                                                         |
|-----------------------------------|---------------------------------------------------------------------------------------------------------------------------------------------------------|
| Empirical formula                 | C42 H46 Si2                                                                                                                                             |
| Formula weight                    | 606.97                                                                                                                                                  |
| Temperature                       | 113.0 K                                                                                                                                                 |
| Wavelength                        | 0.71075 Å                                                                                                                                               |
| Crystal system                    | Monoclinic                                                                                                                                              |
| Space group                       | P2(1)/c                                                                                                                                                 |
| Unit cell dimensions              | $a = 26.848(2) \text{ Å}$ $\alpha = 90^\circ$<br>$b = 34.169(2) \text{ Å}$ $\beta = 90.500(5)^\circ$<br>$c = 7.6508(6) \text{ Å}$ $\gamma = 90^\circ$ . |
| Volume                            | 7018.3(9) Å <sup>3</sup>                                                                                                                                |
| Z                                 | 8                                                                                                                                                       |
| Density (calculated)              | 1.149 mg/m <sup>3</sup>                                                                                                                                 |
| Absorption coefficient            | 0.129 mm <sup>-1</sup>                                                                                                                                  |
| F(000)                            | 2608                                                                                                                                                    |
| Crystal size                      | 0.24 × 0.12 × 0.10 mm <sup>3</sup>                                                                                                                      |
| Theta range for data collection   | 1.40° to 27.90°                                                                                                                                         |
| Index ranges                      | -31 ≤ h ≤ 31, -40 ≤ k ≤ 40, -8 ≤ l ≤ 9                                                                                                                  |
| Reflections collected             | 73565                                                                                                                                                   |
| Independent reflections           | 12348 [R(int) = 0.0600]                                                                                                                                 |
| Completeness to theta = 25.00°    | 100 %                                                                                                                                                   |
| Absorption correction             | Semi-empirical from equivalents                                                                                                                         |
| Max. and min. transmission        | 0.9872 and 0.9697                                                                                                                                       |
| Refinement method                 | Full-matrix least-squares on F <sup>2</sup>                                                                                                             |
| Data / restraints / parameters    | 12348 / 46 / 844                                                                                                                                        |
| Goodness-of-fit on F <sup>2</sup> | 1.377                                                                                                                                                   |
| Final R indices [I > 2σ(I)]       | R1 = 0.0762, wR2 = 0.1643                                                                                                                               |
| R indices (all data)              | R1 = 0.0899, wR2 = 0.1720                                                                                                                               |
| Largest diff. peak and hole       | 0.544 and -0.680 e.Å <sup>-3</sup>                                                                                                                      |

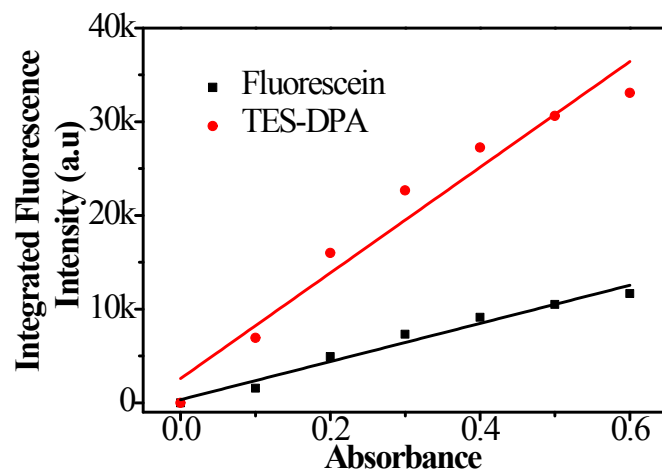

**Figure S2.** Fluorescence quantum efficiency of TES-DPA solution. The efficiency of TES-DPA solution was measured in comparison with fluorescence. Acetone was used as solvent for the two compounds and the excited wavelength was fixed at 430 nm,  $\Phi_F$  of 79% was reported for fluorescence, and a 2.7 times stronger fluorescence was obtained for TES-DPA under the same condition, thus the  $\Phi_F$  of TES-DPA was estimated as 100%.

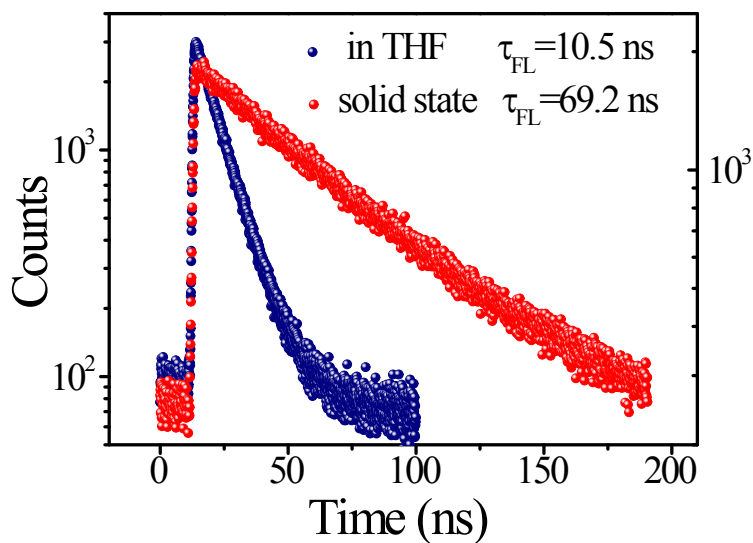

**Figure S3** Time-resolved peak fluorescence of TES-DPA in THF and in crystalline solid state recorded on F906 (Edinburgh instrument)

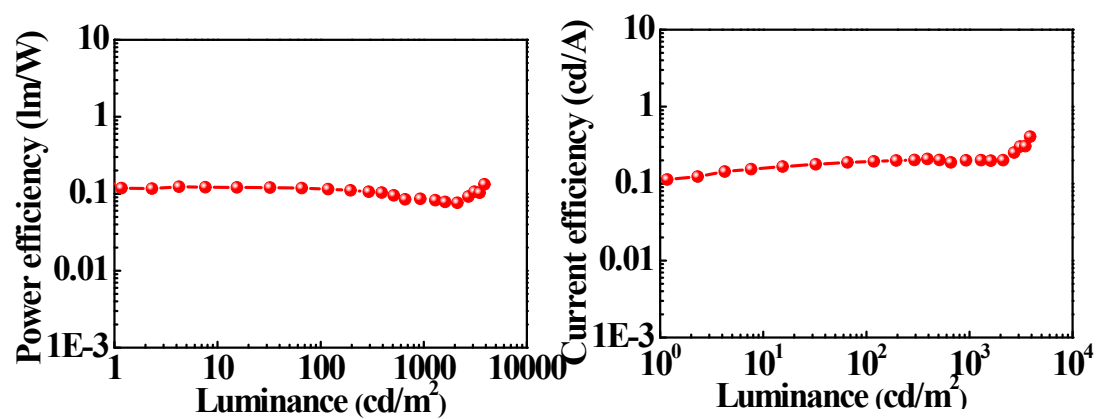

**Figure S4** Power efficiency and current efficiency of the OLED devices based on TES-DPA, the relatively poor efficiencies might be derived from the high hole-transport property of TES-DPA and easy crystallization of the material, which can be improved by further optimization of the fabrication process, correlated study was under way.
